# Supplementary material for: Interstellar formation of lactaldehyde, a key intermediate in the methylglyoxal pathway
Source: PubMed Central journal article supplement (PMC11586434; doi:10.1038/s41467-024-54562-x), 2024-11-24
Supplement: 41467_2024_54562_MOESM2_ESM.pdf [file 41467_2024_54562_MOESM2_ESM.pdf]

## Description of Additional Supplementary Files

File name: Supplementary Data 1

Description: This file includes optimized cartesian coordinates, harmonic frequencies, and infrared intensities of C<sub>3</sub>H<sub>6</sub>O<sub>2</sub> isomers calculated at the composite CBS-QB3 level of theory.
